# Supplementary material for: Mpox Incidence and Vaccine Uptake in Men Who Have Sex with Men and Are Living with HIV in Denmark
Source: MDPI journal article supplement (doi:10.3390/vaccines11071167), 2023-06-27
Supplement: s1 [file s1]

## Supplementary Materials

**Table S1.** Missing data for clinical characteristics and survey responses

| <b>All participants</b>                                   | <b>Missing data</b> |
|-----------------------------------------------------------|---------------------|
| <b>n = 227</b>                                            | <b>n (%)</b>        |
| Age (years)                                               | 0 (0%)              |
| Men                                                       | 0 (0%)              |
| Alcohol (grams per week)                                  | 0 (0%)              |
| Alcohol more than 10 units per week                       | 0 (0%)              |
| Smoking status                                            | 11 (1.5%)           |
| Origin                                                    | 0 (0%)              |
| Plasma HIV RNA < 50 copies/mL                             | 0 (0%)              |
| Blood CD4 <sup>+</sup> T lymphocyte count, cells/ $\mu$ L | 127 (17.5%)         |
| Education                                                 | 31 (4.3%)           |
| STD in the preceding two years                            | 0 (0%)              |

| <b>Participants who answered the online survey</b>                      | <b>Missing data</b> |
|-------------------------------------------------------------------------|---------------------|
| <b>n = 401</b>                                                          | <b>n (%)</b>        |
| Have you heard about mpox?                                              | 2 (0.5%)            |
| Do you see yourself as being at risk of the mpox infection?             | 2 (0.5%)            |
| Have you heard about the mpox vaccine?                                  | 11 (2.7%)           |
| Have you been offered the vaccine?                                      | 12 (3%)             |
| Have you received the mpox vaccine?                                     | 11 (2.7%)           |
| Why did you choose to get the vaccine?                                  | 0 missing           |
| Why did you choose not to get the vaccine?                              | 0 missing           |
| On a scale of 1-5 how willing are you to get the mpox vaccine?          | 38 (9.5%)           |
| On a scale of 1-5 how worried are you about getting infected with mpox? | 6 (1.5%)            |

---

|                                                                    |           |
|--------------------------------------------------------------------|-----------|
| <b>How many sexual partners have you had in the last 12 weeks?</b> | 11 (2.7%) |
|--------------------------------------------------------------------|-----------|

---

|                                                           |         |
|-----------------------------------------------------------|---------|
| <b>Have you received the smallpox vaccine as a child?</b> | 12 (3%) |
|-----------------------------------------------------------|---------|

---

| STD, sexually transmitted disease |  |

**Table S2.** Prediction of incident mpox using Cox regression

| <b>Unadjusted</b>                   | <b>Hazard Ratio</b>   | <b>P-value</b> |
|-------------------------------------|-----------------------|----------------|
| Age (per year)                      | 0.9, 95% CI 0.8-0.9   | 0.01           |
| STD in the preceding 2 years        | 10.1, 95% CI 2.8-36.6 | <0.001         |
| Alcohol (units per week)            | 0.9, 95% CI 0.9-1.0   | 0.2            |
| Alcohol more than 10 units per week | 0.6, 95% CI 0.2-2.0   | 0.4            |
| Undetectable viral load             | 0.7, 95% CI 0.1-5.6   | 0.8            |
| <b>Model 1</b>                      | <b>Hazard Ratio</b>   | <b>P-value</b> |
| Age (per year)                      | 0.95, 95% CI 0.9-1.0  | 0.1            |
| STD in the preceding 2 years        | 7.1, 95% CI 1.9-26.9  | 0.004          |

Model 1 is adjusted for age and a diagnosis with at least one STD in the preceding two

years. STD, sexually transmitted disease

**Table S3.** Univariable and multivariable logistic regression of the factors associated with vaccine uptake among MSM LWH

|                                     | Mpox vaccination uptake |         |         |                     |         |         |
|-------------------------------------|-------------------------|---------|---------|---------------------|---------|---------|
|                                     | Univariable model       |         |         | Multivariable model |         |         |
|                                     | OR                      | 95%CI   | p-value | aOR                 | 95%CI   | p-value |
| Age (per year)                      | 0.9                     | 0.9-1.0 | 0.003   | 0.9                 | 0.9-1.0 | 0.2     |
| STD in the preceding 2 years        | 3.4                     | 2.4-7.8 | <0.001  | 3.1                 | 2.2-4.6 | <0.001  |
| Alcohol (units per week)            | 1.0                     | 1.0-1.0 | 0.2     |                     |         |         |
| Alcohol more than 10 units per week | 0.9                     | 0.7-1.3 | 0.6     |                     |         |         |
| Smoking status                      |                         |         |         |                     |         |         |
| Never smoker                        | Ref.                    |         |         | Ref.                |         |         |

|                                 |      |         |      |     |         |      |
|---------------------------------|------|---------|------|-----|---------|------|
| Ex-smoker                       | 0.8  | 0.6-1.2 | 0.21 | 0.9 | 0.6-1.4 | 0.8  |
| Current smoker                  | 0.6  | 0.4-0.9 | 0.01 | 0.6 | 0.4-0.9 | 0.01 |
| <b>Origin</b>                   |      |         |      |     |         |      |
| Scandinavian                    | Ref. |         |      |     |         |      |
| Other                           | 0.9  | 0.5-1.4 | 0.6  |     |         |      |
| Other European                  | 0.7  | 0.4-1.2 | 0.2  |     |         |      |
| <b>Education</b>                |      |         |      |     |         |      |
| Long education                  | Ref. |         |      |     |         |      |
| No education or short education | 0.8  | 0.6-1.2 | 0.3  |     |         |      |
| <b>Undetectable viral load</b>  | 0.8  | 0.4-1.4 | 0.4  |     |         |      |
| <b>CD4</b>                      | 1.0  | 1.0-1.0 | 0.6  |     |         |      |

OR, odds ratio; CI, confidence interval; aOR, adjusted odds ratio; STD, sexually transmitted disease Multivariable model is adjusted for age, STD and smoking status.



| #                                                                                                                                                                                                           | Variable / Field Name                                         | Field Label<br><i>Field Note</i>                                                                                                                                                                                                                 | Field Attributes (Field Type, Validation, Choices, Calculations, etc.)                                     |
|-------------------------------------------------------------------------------------------------------------------------------------------------------------------------------------------------------------|---------------------------------------------------------------|--------------------------------------------------------------------------------------------------------------------------------------------------------------------------------------------------------------------------------------------------|------------------------------------------------------------------------------------------------------------|
| Instrument: <b>Spørgeskema om Vaccination mod Abekopper</b> (sprgeskema_om_vaccination_mod_abekopper)  Enabled as survey |                                                               |                                                                                                                                                                                                                                                  |                                                                                                            |
| 1                                                                                                                                                                                                           | [participant_id]                                              | Participant ID                                                                                                                                                                                                                                   | text                                                                                                       |
| 2                                                                                                                                                                                                           | [consent]                                                     | Tak fordi, du har valgt at deltage i spørgeskemaundersøgelsen. I det følgende spørgeskema vil vi still dig nogle spørgsmål om abekopper og vaccination. Ved at klikke ja giver du samtykke til, vi må bruge dine oplysninger fra COCOMO-studiet. | radio<br>1 Ja                                                                                              |
| 3                                                                                                                                                                                                           | [cpr_0]<br>Show the field ONLY if: [consent] = '1'            | Ved at udfylde dit CPR-nummer har vi mulighed for at sammenkoble din besvarelse med blodprøvesvar.                                                                                                                                               | descriptive                                                                                                |
| 4                                                                                                                                                                                                           | [cpr]<br>Show the field ONLY if: [consent] = '1'              | Indtast dit CPR-nummer                                                                                                                                                                                                                           | text (CPR_danish)                                                                                          |
| 5                                                                                                                                                                                                           | [nocpr]<br>Show the field ONLY if: [consent] = '1'            | Jeg ønsker ikke at udfylde CPR-nummer                                                                                                                                                                                                            | radio<br>0 Jeg ønsker ikke at udfylde CPR-nummer                                                           |
| 6                                                                                                                                                                                                           | [q1]<br>Show the field ONLY if: [consent] = '1'               | Section Header: Spørgsmål om abekopper også kaldet monkeypox<br>Har du hørt om abekopper?                                                                                                                                                        | radio, Required<br>1 Ja<br>0 Nej<br>9 Ved ikke / ønsker ikke at svare<br>Question number: 1                |
| 7                                                                                                                                                                                                           | [q2]<br>Show the field ONLY if: [consent] = '1'               | Ser du dig selv som værende i risikogruppen for at få abekopper?                                                                                                                                                                                 | radio, Required<br>1 Ja<br>0 Nej<br>9 Ved ikke / ønsker ikke at svare<br>Question number: 2                |
| 8                                                                                                                                                                                                           | [monkeypox]                                                   | På en skala fra 1-5, hvor 1 er 'slet ikke bekymret' og 5 er 'ekstremt bekymret'. Hvor bekymret er du for at få abekopper?                                                                                                                        | radio (Matrix)<br>1 1<br>2 2<br>3 3<br>4 4<br>5 5<br>9 Ved ikke/Ønsker ikke at svare<br>Question number: 3 |
| 9                                                                                                                                                                                                           | [q3]<br>Show the field ONLY if: [consent] = '1'               | Section Header: Spørgsmål om vaccine mod abekopper<br>Har du hørt om vaccinen mod abekopper?                                                                                                                                                     | radio, Required<br>1 Ja<br>0 Nej<br>9 Ved ikke / ønsker ikke at svare<br>Question number: 4                |
| 10                                                                                                                                                                                                          | [vaccine]<br>Show the field ONLY if: [q3] = '1' or [q3] = '9' | På en skala fra 1-5, hvor 1 er 'slet ikke villig' og 5 er 'ekstremt villig'. Hvor villig er du til at få vaccinen mod abekopper?                                                                                                                 | radio (Matrix)<br>1 1<br>2 2<br>3 3<br>4 4<br>5 5<br>9 Ved ikke/Ønsker ikke at svare<br>Question number: 5 |
| 11                                                                                                                                                                                                          | [q_partners]                                                  | Hvor mange seksualpartnere har du haft i de sidste 12 uger?                                                                                                                                                                                      | text (number, Min: 0), Required<br>Question number: 6                                                      |



|    |                                                         |                                                                                                 |                                                                                                                                                                                                                                                                                                                                                                                                                                                                                                                                                                                                                                                                                                                                          |   |            |                                              |            |       |                                                                      |   |       |                                                 |   |       |                                                                                                 |   |       |                               |   |       |                                 |   |       |       |   |       |                                 |
|----|---------------------------------------------------------|-------------------------------------------------------------------------------------------------|------------------------------------------------------------------------------------------------------------------------------------------------------------------------------------------------------------------------------------------------------------------------------------------------------------------------------------------------------------------------------------------------------------------------------------------------------------------------------------------------------------------------------------------------------------------------------------------------------------------------------------------------------------------------------------------------------------------------------------------|---|------------|----------------------------------------------|------------|-------|----------------------------------------------------------------------|---|-------|-------------------------------------------------|---|-------|-------------------------------------------------------------------------------------------------|---|-------|-------------------------------|---|-------|---------------------------------|---|-------|-------|---|-------|---------------------------------|
| 12 | [q4]<br>Show the field ONLY if:<br>[consent] = '1'      | Er du blevet tilbudt vaccinen mod abekopper?                                                    | radio, Required<br><table border="1"> <tr><td>1</td><td>Ja</td></tr> <tr><td>0</td><td>Nej</td></tr> <tr><td>9</td><td>Ved ikke / ønsker ikke at svare</td></tr> </table><br>Question number: 7                                                                                                                                                                                                                                                                                                                                                                                                                                                                                                                                          | 1 | Ja         | 0                                            | Nej        | 9     | Ved ikke / ønsker ikke at svare                                      |   |       |                                                 |   |       |                                                                                                 |   |       |                               |   |       |                                 |   |       |       |   |       |                                 |
| 1  | Ja                                                      |                                                                                                 |                                                                                                                                                                                                                                                                                                                                                                                                                                                                                                                                                                                                                                                                                                                                          |   |            |                                              |            |       |                                                                      |   |       |                                                 |   |       |                                                                                                 |   |       |                               |   |       |                                 |   |       |       |   |       |                                 |
| 0  | Nej                                                     |                                                                                                 |                                                                                                                                                                                                                                                                                                                                                                                                                                                                                                                                                                                                                                                                                                                                          |   |            |                                              |            |       |                                                                      |   |       |                                                 |   |       |                                                                                                 |   |       |                               |   |       |                                 |   |       |       |   |       |                                 |
| 9  | Ved ikke / ønsker ikke at svare                         |                                                                                                 |                                                                                                                                                                                                                                                                                                                                                                                                                                                                                                                                                                                                                                                                                                                                          |   |            |                                              |            |       |                                                                      |   |       |                                                 |   |       |                                                                                                 |   |       |                               |   |       |                                 |   |       |       |   |       |                                 |
| 13 | [q5]<br>Show the field ONLY if:<br>[consent] = '1'      | Har du fået vaccinen mod abekopper?                                                             | radio, Required<br><table border="1"> <tr><td>1</td><td>Ja</td></tr> <tr><td>0</td><td>Nej</td></tr> <tr><td>9</td><td>Ved ikke / ønsker ikke at svare</td></tr> </table><br>Question number: 8                                                                                                                                                                                                                                                                                                                                                                                                                                                                                                                                          | 1 | Ja         | 0                                            | Nej        | 9     | Ved ikke / ønsker ikke at svare                                      |   |       |                                                 |   |       |                                                                                                 |   |       |                               |   |       |                                 |   |       |       |   |       |                                 |
| 1  | Ja                                                      |                                                                                                 |                                                                                                                                                                                                                                                                                                                                                                                                                                                                                                                                                                                                                                                                                                                                          |   |            |                                              |            |       |                                                                      |   |       |                                                 |   |       |                                                                                                 |   |       |                               |   |       |                                 |   |       |       |   |       |                                 |
| 0  | Nej                                                     |                                                                                                 |                                                                                                                                                                                                                                                                                                                                                                                                                                                                                                                                                                                                                                                                                                                                          |   |            |                                              |            |       |                                                                      |   |       |                                                 |   |       |                                                                                                 |   |       |                               |   |       |                                 |   |       |       |   |       |                                 |
| 9  | Ved ikke / ønsker ikke at svare                         |                                                                                                 |                                                                                                                                                                                                                                                                                                                                                                                                                                                                                                                                                                                                                                                                                                                                          |   |            |                                              |            |       |                                                                      |   |       |                                                 |   |       |                                                                                                 |   |       |                               |   |       |                                 |   |       |       |   |       |                                 |
| 14 | [q6]<br>Show the field ONLY if:<br>[q5] = '1'           | Hvorfor valgte du at takke ja til vaccinen mod abekopper?                                       | checkbox, Required<br><table border="1"> <tr><td>1</td><td>q6__1</td><td>Jeg ser mig selv som værende i risikogruppen</td></tr> <tr><td>2</td><td>q6__2</td><td>Jeg er bekymret for konsekvenserne af at blive smittet med abekopper</td></tr> <tr><td>3</td><td>q6__3</td><td>Jeg har fået det anbefalet af en sundhedsfaglig</td></tr> <tr><td>4</td><td>q6__4</td><td>Jeg har fået den anbefalet af en ven/familiemedlem/partner</td></tr> <tr><td>5</td><td>q6__5</td><td>Andet</td></tr> <tr><td>9</td><td>q6__9</td><td>Ved ikke / ønsker ikke at svare</td></tr> </table><br>Question number: 9                                                                                                                                   | 1 | q6__1      | Jeg ser mig selv som værende i risikogruppen | 2          | q6__2 | Jeg er bekymret for konsekvenserne af at blive smittet med abekopper | 3 | q6__3 | Jeg har fået det anbefalet af en sundhedsfaglig | 4 | q6__4 | Jeg har fået den anbefalet af en ven/familiemedlem/partner                                      | 5 | q6__5 | Andet                         | 9 | q6__9 | Ved ikke / ønsker ikke at svare |   |       |       |   |       |                                 |
| 1  | q6__1                                                   | Jeg ser mig selv som værende i risikogruppen                                                    |                                                                                                                                                                                                                                                                                                                                                                                                                                                                                                                                                                                                                                                                                                                                          |   |            |                                              |            |       |                                                                      |   |       |                                                 |   |       |                                                                                                 |   |       |                               |   |       |                                 |   |       |       |   |       |                                 |
| 2  | q6__2                                                   | Jeg er bekymret for konsekvenserne af at blive smittet med abekopper                            |                                                                                                                                                                                                                                                                                                                                                                                                                                                                                                                                                                                                                                                                                                                                          |   |            |                                              |            |       |                                                                      |   |       |                                                 |   |       |                                                                                                 |   |       |                               |   |       |                                 |   |       |       |   |       |                                 |
| 3  | q6__3                                                   | Jeg har fået det anbefalet af en sundhedsfaglig                                                 |                                                                                                                                                                                                                                                                                                                                                                                                                                                                                                                                                                                                                                                                                                                                          |   |            |                                              |            |       |                                                                      |   |       |                                                 |   |       |                                                                                                 |   |       |                               |   |       |                                 |   |       |       |   |       |                                 |
| 4  | q6__4                                                   | Jeg har fået den anbefalet af en ven/familiemedlem/partner                                      |                                                                                                                                                                                                                                                                                                                                                                                                                                                                                                                                                                                                                                                                                                                                          |   |            |                                              |            |       |                                                                      |   |       |                                                 |   |       |                                                                                                 |   |       |                               |   |       |                                 |   |       |       |   |       |                                 |
| 5  | q6__5                                                   | Andet                                                                                           |                                                                                                                                                                                                                                                                                                                                                                                                                                                                                                                                                                                                                                                                                                                                          |   |            |                                              |            |       |                                                                      |   |       |                                                 |   |       |                                                                                                 |   |       |                               |   |       |                                 |   |       |       |   |       |                                 |
| 9  | q6__9                                                   | Ved ikke / ønsker ikke at svare                                                                 |                                                                                                                                                                                                                                                                                                                                                                                                                                                                                                                                                                                                                                                                                                                                          |   |            |                                              |            |       |                                                                      |   |       |                                                 |   |       |                                                                                                 |   |       |                               |   |       |                                 |   |       |       |   |       |                                 |
| 15 | [q6comment]<br>Show the field ONLY if:<br>[q6(5)] = '1' | Du har svaret "Andet". Beskriv venligst nærmere                                                 | notes                                                                                                                                                                                                                                                                                                                                                                                                                                                                                                                                                                                                                                                                                                                                    |   |            |                                              |            |       |                                                                      |   |       |                                                 |   |       |                                                                                                 |   |       |                               |   |       |                                 |   |       |       |   |       |                                 |
| 16 | [q7]<br>Show the field ONLY if:<br>[q5] = '0'           | Hvorfor valgte du at takke nej til vaccinen mod abekopper?                                      | checkbox, Required<br><table border="1"> <tr><td>1</td><td>q7__1</td><td>Jeg har allerede haft abekopper</td></tr> <tr><td>2</td><td>q7__2</td><td>Jeg ser ikke mig selv som værende i risikogruppen</td></tr> <tr><td>3</td><td>q7__3</td><td>Jeg tror ikke på, at vaccinen er effektiv</td></tr> <tr><td>4</td><td>q7__4</td><td>Jeg gør brug af alle de nødvendige forebyggende metoder for ikke at blive smittet med abekopper</td></tr> <tr><td>5</td><td>q7__5</td><td>Jeg har ikke hørt om vaccinen</td></tr> <tr><td>7</td><td>q7__7</td><td>Jeg er allergisk</td></tr> <tr><td>6</td><td>q7__6</td><td>Andet</td></tr> <tr><td>9</td><td>q7__9</td><td>Ved ikke / ønsker ikke at svare</td></tr> </table><br>Question number: 9 | 1 | q7__1      | Jeg har allerede haft abekopper              | 2          | q7__2 | Jeg ser ikke mig selv som værende i risikogruppen                    | 3 | q7__3 | Jeg tror ikke på, at vaccinen er effektiv       | 4 | q7__4 | Jeg gør brug af alle de nødvendige forebyggende metoder for ikke at blive smittet med abekopper | 5 | q7__5 | Jeg har ikke hørt om vaccinen | 7 | q7__7 | Jeg er allergisk                | 6 | q7__6 | Andet | 9 | q7__9 | Ved ikke / ønsker ikke at svare |
| 1  | q7__1                                                   | Jeg har allerede haft abekopper                                                                 |                                                                                                                                                                                                                                                                                                                                                                                                                                                                                                                                                                                                                                                                                                                                          |   |            |                                              |            |       |                                                                      |   |       |                                                 |   |       |                                                                                                 |   |       |                               |   |       |                                 |   |       |       |   |       |                                 |
| 2  | q7__2                                                   | Jeg ser ikke mig selv som værende i risikogruppen                                               |                                                                                                                                                                                                                                                                                                                                                                                                                                                                                                                                                                                                                                                                                                                                          |   |            |                                              |            |       |                                                                      |   |       |                                                 |   |       |                                                                                                 |   |       |                               |   |       |                                 |   |       |       |   |       |                                 |
| 3  | q7__3                                                   | Jeg tror ikke på, at vaccinen er effektiv                                                       |                                                                                                                                                                                                                                                                                                                                                                                                                                                                                                                                                                                                                                                                                                                                          |   |            |                                              |            |       |                                                                      |   |       |                                                 |   |       |                                                                                                 |   |       |                               |   |       |                                 |   |       |       |   |       |                                 |
| 4  | q7__4                                                   | Jeg gør brug af alle de nødvendige forebyggende metoder for ikke at blive smittet med abekopper |                                                                                                                                                                                                                                                                                                                                                                                                                                                                                                                                                                                                                                                                                                                                          |   |            |                                              |            |       |                                                                      |   |       |                                                 |   |       |                                                                                                 |   |       |                               |   |       |                                 |   |       |       |   |       |                                 |
| 5  | q7__5                                                   | Jeg har ikke hørt om vaccinen                                                                   |                                                                                                                                                                                                                                                                                                                                                                                                                                                                                                                                                                                                                                                                                                                                          |   |            |                                              |            |       |                                                                      |   |       |                                                 |   |       |                                                                                                 |   |       |                               |   |       |                                 |   |       |       |   |       |                                 |
| 7  | q7__7                                                   | Jeg er allergisk                                                                                |                                                                                                                                                                                                                                                                                                                                                                                                                                                                                                                                                                                                                                                                                                                                          |   |            |                                              |            |       |                                                                      |   |       |                                                 |   |       |                                                                                                 |   |       |                               |   |       |                                 |   |       |       |   |       |                                 |
| 6  | q7__6                                                   | Andet                                                                                           |                                                                                                                                                                                                                                                                                                                                                                                                                                                                                                                                                                                                                                                                                                                                          |   |            |                                              |            |       |                                                                      |   |       |                                                 |   |       |                                                                                                 |   |       |                               |   |       |                                 |   |       |       |   |       |                                 |
| 9  | q7__9                                                   | Ved ikke / ønsker ikke at svare                                                                 |                                                                                                                                                                                                                                                                                                                                                                                                                                                                                                                                                                                                                                                                                                                                          |   |            |                                              |            |       |                                                                      |   |       |                                                 |   |       |                                                                                                 |   |       |                               |   |       |                                 |   |       |       |   |       |                                 |
| 17 | [q7comment]<br>Show the field ONLY if:<br>[q7(6)] = '1' | Du har svaret "Andet". Beskriv venligst nærmere                                                 | notes                                                                                                                                                                                                                                                                                                                                                                                                                                                                                                                                                                                                                                                                                                                                    |   |            |                                              |            |       |                                                                      |   |       |                                                 |   |       |                                                                                                 |   |       |                               |   |       |                                 |   |       |       |   |       |                                 |
| 18 | [variola]<br>Show the field ONLY if:<br>[consent] = '1' | Har du som barn fået koppevaccinen?"                                                            | radio, Required<br><table border="1"> <tr><td>1</td><td>Ja</td></tr> <tr><td>0</td><td>Nej</td></tr> <tr><td>9</td><td>Ved ikke / ønsker ikke at svare</td></tr> </table><br>Question number: 10                                                                                                                                                                                                                                                                                                                                                                                                                                                                                                                                         | 1 | Ja         | 0                                            | Nej        | 9     | Ved ikke / ønsker ikke at svare                                      |   |       |                                                 |   |       |                                                                                                 |   |       |                               |   |       |                                 |   |       |       |   |       |                                 |
| 1  | Ja                                                      |                                                                                                 |                                                                                                                                                                                                                                                                                                                                                                                                                                                                                                                                                                                                                                                                                                                                          |   |            |                                              |            |       |                                                                      |   |       |                                                 |   |       |                                                                                                 |   |       |                               |   |       |                                 |   |       |       |   |       |                                 |
| 0  | Nej                                                     |                                                                                                 |                                                                                                                                                                                                                                                                                                                                                                                                                                                                                                                                                                                                                                                                                                                                          |   |            |                                              |            |       |                                                                      |   |       |                                                 |   |       |                                                                                                 |   |       |                               |   |       |                                 |   |       |       |   |       |                                 |
| 9  | Ved ikke / ønsker ikke at svare                         |                                                                                                 |                                                                                                                                                                                                                                                                                                                                                                                                                                                                                                                                                                                                                                                                                                                                          |   |            |                                              |            |       |                                                                      |   |       |                                                 |   |       |                                                                                                 |   |       |                               |   |       |                                 |   |       |       |   |       |                                 |
| 19 | [sprgeskema_om_vaccination_mod_abekopper_complete]      | Section Header: Form Status<br>Complete?                                                        | dropdown<br><table border="1"> <tr><td>0</td><td>Incomplete</td></tr> <tr><td>1</td><td>Unverified</td></tr> <tr><td>2</td><td>Complete</td></tr> </table>                                                                                                                                                                                                                                                                                                                                                                                                                                                                                                                                                                               | 0 | Incomplete | 1                                            | Unverified | 2     | Complete                                                             |   |       |                                                 |   |       |                                                                                                 |   |       |                               |   |       |                                 |   |       |       |   |       |                                 |
| 0  | Incomplete                                              |                                                                                                 |                                                                                                                                                                                                                                                                                                                                                                                                                                                                                                                                                                                                                                                                                                                                          |   |            |                                              |            |       |                                                                      |   |       |                                                 |   |       |                                                                                                 |   |       |                               |   |       |                                 |   |       |       |   |       |                                 |
| 1  | Unverified                                              |                                                                                                 |                                                                                                                                                                                                                                                                                                                                                                                                                                                                                                                                                                                                                                                                                                                                          |   |            |                                              |            |       |                                                                      |   |       |                                                 |   |       |                                                                                                 |   |       |                               |   |       |                                 |   |       |       |   |       |                                 |
| 2  | Complete                                                |                                                                                                 |                                                                                                                                                                                                                                                                                                                                                                                                                                                                                                                                                                                                                                                                                                                                          |   |            |                                              |            |       |                                                                      |   |       |                                                 |   |       |                                                                                                 |   |       |                               |   |       |                                 |   |       |       |   |       |                                 |

**Figure S1.** Mpox vaccine survey

## Mpox vaccine survey translated to English.

Question 1: Have you heard about mpox? (yes/no)

Question 2: Do you see yourself as being at risk of the mpox infection? (yes/no)

Question 3: Have you heard about the mpox vaccine? (yes/no)

Question 4: Have you been offered the vaccine against mpox? (yes/no)

Question 5: Have you received the mpox vaccine? (yes/no)

Question 6: Why did you choose to get the vaccine?

- I see myself as being in the risk group
- I am worried about the consequences of being infected with mpox
- It was recommended by a health care professional
- It was recommended by a friend/family member/partner - Other reason

Question 7: Why did you choose not to get the vaccine?

- I have already had mpox
- I am not seeing myself as being in the risk group
- I don't believe in the efficiency of the vaccine
- I'm using all other sorts of protecting measures in order not to get infected with mpox
- I have not heard about the vaccine
- I am allergic
- Other reason
- Don't know/don't wish to answer

Question 8: On a scale of 1-5, where 1 is "not worried at all" and 5 is "very worried", how worried are you about getting infected with mpox? (1-5)

Question 9: On a scale of 1-5, where 1 is "not willing at all" and 5 is "very willing", how willing are you to get the mpox vaccine? (1-5)

Question 10: How many sexual partners have you had in the last 12 weeks?

Question 11: Have you received the smallpox vaccine as a child?
